# Supplementary material
Source: PubMed Central journal article supplement (PMC4196980)
Supplement: embr0015-0766-sd1.pdf [file embr0015-0766-sd1.pdf]

**TABLE S1. KCC2 (*SLC12A5*) variants detected in the IGE cohort, and corresponding Exome Variant Server data.**

| Non-synonymous variants detected in the “hotspot” |                     | Detection of variants in IGE cohort |                   |                      | Control data - Exome Variant Server |                      |                       |                                     |                   |                      |                       |                                      |
|---------------------------------------------------|---------------------|-------------------------------------|-------------------|----------------------|-------------------------------------|----------------------|-----------------------|-------------------------------------|-------------------|----------------------|-----------------------|--------------------------------------|
|                                                   |                     |                                     |                   |                      | European American data              |                      |                       |                                     | All data          |                      |                       |                                      |
| mRNA (NM_020708.4)                                | Protein (NP_065759) | Number of probands                  | Number of alleles | Allele frequency (%) | Number of alleles                   | Allele frequency (%) | p-value               | Odds ratio                          | Number of alleles | Allele frequency (%) | p-value               | Odds ratio                           |
| c.2855 G>A                                        | p.R952H             | 5/380                               | 5/760             | 0.66                 | 6/8600                              | 0.07                 | 1.09X10 <sup>-3</sup> | 9.42<br>CI <sub>95</sub> [2.3-37.1] | 7/13006           | 0.05                 | 2.97X10 <sup>-4</sup> | 12.22<br>CI <sub>95</sub> [3.1-44.8] |
| c.3145 C>T                                        | p.R1049C            | 3/380                               | 3/760             | 0.39                 | 0/8600                              | 0.00                 | 5.39X10 <sup>-4</sup> | Inf<br>CI <sub>95</sub> [4.7-Inf]   | 0/13006           | 0.00                 | 1.70X10 <sup>-4</sup> | Inf<br>CI <sub>95</sub> [7.1-Inf]    |
| Total number of non-synonymous alleles detected   |                     | 8/380                               | 8/760             | -                    | 14/8600                             | -                    | 2.20X10 <sup>-4</sup> | 6.46<br>CI <sub>95</sub> [2.3-16.6] | 19/13006          | -                    | 7.67X10 <sup>-5</sup> | 7.20<br>CI <sub>95</sub> [2.7-17.3]  |
