# Supplementary material
Source: PubMed Central journal article supplement (PMC4196980)
Supplement: embr0015-0766-sd2.pdf [file embr0015-0766-sd2.pdf]

**TABLE S2. Clinical features of patients with *SLC12A5* (KCC2) variants.**

| Variant              | Patient | Sex | Ethnicity | Febrile seizures | Onset afebrile seizure | Seizure Types            | EEG                                    | Photosensitivity |
|----------------------|---------|-----|-----------|------------------|------------------------|--------------------------|----------------------------------------|------------------|
| <b>p.952 R&gt;H</b>  | 1       | M   | Unknown   | Unknown          | Unknown                | IGE                      | Unknown                                | Unknown          |
|                      | 2       | M   | FC        | No               | 14                     | GTC, Myoclonus           | GSW, bilateral spikes temporal/central | No               |
|                      | 3       | F   | FC        | No               | Unknown                | Generalized              | Unknown                                | Unknown          |
|                      | 4       | F   | FC        | No               | 21                     | GTC, Absences            | Abnormal, anterior theta               | No               |
|                      | 5       | M   | FC        | No               | 20                     | GTC                      | Normal                                 | Unknown          |
| <b>p.1049 R&gt;C</b> | 6       | F   | FC        | No               | 8                      | GTC, Absences, Myoclonus | Abnormal, GSW                          | No               |
|                      | 7       | M   | FC        | No               | 3                      | GTC, Absences, Myoclonus | Unknown                                | Unknown          |
|                      | 8       | M   | FC        | No               | 14                     | GTC, Absences            | Normal, diffuse theta                  | No               |

EEG = Electroencephalogram, F = Female, FC = French Canadian, GSW = Generalized Spike and Wave, GTC = Generalized Tonic-Clonic, IGE = Idiopathic Generalized Epilepsy, M = Male.
