# Supplementary material
Source: PubMed Central journal article supplement (PMC4196980)
Supplement: embr0015-0766-sd3.pdf [file embr0015-0766-sd3.pdf]

**Table S3. Results of the statistical analysis of  $E_{Gly}$  in N2a cells expressing different mCherry-KCC2 mutants. The mean and SEM values are shown in Figure 2. SD = standard deviation, SEM = standard error of the mean, CV = coefficient of variation.**

$E_{Gly}$

|           | <b>Mean</b> | <b>SD</b> | <b>SEM</b> | <b>Median</b> | <b>CV</b> | <b>n</b> |
|-----------|-------------|-----------|------------|---------------|-----------|----------|
| Mock      | -38.1       | 11.0      | 3.7        | -35           | -0.29     | 9        |
| Wild-Type | -89.4       | 10.5      | 3.2        | -90           | -0.12     | 11       |
| R1049C    | -64.5       | 12.7      | 3.7        | -64           | -0.20     | 12       |
| R952H     | -59.4       | 18.9      | 5.7        | -62           | -0.32     | 11       |

***p* (One-way ANOVA between pairs of conditions)**

|                  | <b>Mock</b> |                 | <b>Wild-Type</b> |                 | <b>R1049C</b> |                 |
|------------------|-------------|-----------------|------------------|-----------------|---------------|-----------------|
|                  | <b>F</b>    | <b><i>p</i></b> | <b>F</b>         | <b><i>p</i></b> | <b>F</b>      | <b><i>p</i></b> |
| <b>Wild-Type</b> | 112.9       | <0.001          |                  |                 |               |                 |
| <b>R1049C</b>    | 24.9        | <0.001          | 25.9             | <0.001          |               |                 |
| <b>R952H</b>     | 8.9         | 0.008           | 21.3             | <0.001          | 0.6           | 0.45            |
