# Supplementary material
Source: PubMed Central journal article supplement (PMC4196980)
Supplement: embr0015-0766-sd4.pdf [file embr0015-0766-sd4.pdf]

**TABLE S4. Results of the statistical analysis of half decay time of Cl- Sensor ratiometric fluorescence in N2a cells expressing different mCherry-KCC2 mutants. The mean and SEM values are shown in Figure 3. SD = standard deviation, SEM = standard error of the mean, CV = coefficient of variation.**

**Half Decay Time**

|           | <b>Mean</b> | <b>SD</b> | <b>SEM</b> | <b>Median</b> | <b>CV</b> | <b>n</b> |
|-----------|-------------|-----------|------------|---------------|-----------|----------|
| Mock      | 26.8        | 10.5      | 5.2        | 28.2          | 0.39      | 4        |
| Wild-Type | 4.5         | 0.94      | 0.35       | 4.3           | 0.21      | 7        |
| R1049C    | 15.0        | 6.9       | 3.5        | 12.6          | 0.46      | 4        |
| R952H     | 14.0        | 7.7       | 3.9        | 11.9          | 0.55      | 4        |

***p* (One-way ANOVA between pairs of conditions)**

|                  | <b>Mock</b> |                 | <b>Wild-Type</b> |                 | <b>R1049C</b> |                 |
|------------------|-------------|-----------------|------------------|-----------------|---------------|-----------------|
|                  | <b>F</b>    | <b><i>p</i></b> | <b>F</b>         | <b><i>p</i></b> | <b>F</b>      | <b><i>p</i></b> |
| <b>Wild-Type</b> | 34.1        | <0.001          |                  |                 |               |                 |
| <b>R1049C</b>    | 3.5         | 0.1             | 16.8             | 0.003           |               |                 |
| <b>R952H</b>     | 3.9         | 0.09            | 11.2             | 0.009           | 0.03          | 0.86            |
