# Supplementary material
Source: PubMed Central journal article supplement (PMC4196980)
Supplement: embr0015-0766-sd5.pdf [file embr0015-0766-sd5.pdf]

**TABLE S5. Results of the statistical analysis of basal R430/500 fluorescence ratio of Cl<sup>-</sup> Sensor in N2a cells expressing different mCherry-KCC2 mutants. The mean and SEM values are shown in Figure 3. SD = standard deviation, SEM = standard error of the mean, CV = coefficient of variation.**

**R430/500**

|           | <b>Mean</b> | <b>SD</b> | <b>SEM</b> | <b>Median</b> | <b>CV</b> | <b>n</b> |
|-----------|-------------|-----------|------------|---------------|-----------|----------|
| Mock      | 1.2         | 0.10      | 0.05       | 1.16          | 0.09      | 4        |
| Wild-Type | 0.9         | 0.04      | 0.02       | 0.87          | 0.05      | 7        |
| R1049C    | 1.1         | 0.13      | 0.06       | 1.07          | 0.12      | 4        |
| R952H     | 1.1         | 0.15      | 0.08       | 1.09          | 0.15      | 4        |

***p* (One-way ANOVA between pairs of conditions)**

|                  | <b>Mock</b> |                 | <b>Wild-Type</b> |                 | <b>R1049C</b> |                 |
|------------------|-------------|-----------------|------------------|-----------------|---------------|-----------------|
|                  | <b>F</b>    | <b><i>p</i></b> | <b>F</b>         | <b><i>p</i></b> | <b>F</b>      | <b><i>p</i></b> |
| <b>Wild-Type</b> | 43.5        | <0.001          |                  |                 |               |                 |
| <b>R1049C</b>    | 0.9         | 0.36            | 16.7             | 0.003           |               |                 |
| <b>R952H</b>     | 1.4         | 0.28            | 9.1              | 0.014           | 0.08          | 0.79            |
