# Supplementary material
Source: PubMed Central journal article supplement (PMC4196980)
Supplement: embr0015-0766-sd6.pdf [file embr0015-0766-sd6.pdf]

**TABLE S6. Results of the statistical analysis of surface staining ( $F_M$ , arbitrary units). The mean and SEM values are shown in Figure 4. SD = standard deviation, SEM = standard error of the mean, CV = coefficient of variation.**

$E_M$

|           | Mean  | SD   | SEM   | Median | CV  | n  |
|-----------|-------|------|-------|--------|-----|----|
| EGFP      | 0.84  | 1.57 | 0.28  | 0.30   | 1.9 | 31 |
| Wild-Type | 100   | 69.7 | 11.46 | 85.3   | 0.7 | 37 |
| R1049C    | 110.5 | 88.8 | 14.6  | 80.2   | 0.8 | 37 |
| R952H     | 52.4  | 35.5 | 6.17  | 48.9   | 0.7 | 33 |

*p* (One-way ANOVA between pairs of conditions)

|                  | Mock  |          | Wild-Type |          | R1049C |          |
|------------------|-------|----------|-----------|----------|--------|----------|
|                  | F     | <i>p</i> | F         | <i>p</i> | F      | <i>p</i> |
| <b>Wild-Type</b> | 120.8 | <0.001   |           |          |        |          |
| <b>R1049C</b>    | 28.6  | <0.001   | 0.32      | 0.57     |        |          |
| <b>R952H</b>     | 39.2  | <0.001   | 12.5      | <0.001   | 12.4   | <0.001   |
